# Supplementary material for: The allogeneic HLA-DP-restricted T-cell repertoire provoked by allogeneic dendritic cells contains T cells that show restricted recognition of hematopoietic cells including primary malignant cells
Source: PubMed Central journal article supplement — Haematologica. 2018 Sep 20;104(1):197–206. doi: 10.3324/haematol.2018.193680 (PMC6312030; doi:10.3324/haematol.2018.193680), 2019-01
Supplement: 2018.193680.LAGHMOUCHI_SUPPL.pdf [file 2018.193680.LAGHMOUCHI_SUPPL.pdf]

# The allogeneic HLA-DP-restricted T-cell repertoire provoked by allogeneic dendritic cells contains T cells that show restricted recognition of hematopoietic cells including primary malignant cells

Aicha Laghmouchi, Conny Hoogstraten, Peter van Balen, J.H. Frederik Falkenburg and Inge Jedema

Department of Hematology, Leiden University Medical Center, Leiden, the Netherlands

©2019 Ferrata Storti Foundation. This is an open-access paper. doi:10.3324/haematol.2018.193680

Received: March 22, 2018.

Accepted: August 17, 2018.

Pre-published: September 20, 2018.

Correspondence: a.laghmouchi@lumc.nl

---

## **The allo-HLA-DP restricted T cell repertoire provoked by allogeneic dendritic cells contains T cells that show restricted recognition of hematopoietic cells including primary malignant cells**

Aicha Laghmouchi<sup>1</sup>, Conny Hoogstraten<sup>1</sup>, Peter van Balen<sup>1</sup>, J.H.Frederik Falkenburg<sup>1</sup> and Inge Jedema<sup>1</sup>

<sup>1</sup>Department of Hematology, Leiden University Medical Center, Leiden, The Netherlands

### **Online Supplementary Appendix**

#### **Methods**

##### ***Cell collection and preparation***

Peripheral blood mononuclear cells (PB-MNC) were isolated using Ficoll-Isopaque separation. Peripheral blood was obtained from healthy donors and patients after informed consent. Lymphocytes were enriched by using magnetic cell separation (MACS) to deplete CD14<sup>+</sup> cells with magnetic CD14-beads and LS columns according to manufacturer's instructions (Miltenyi Biotec, Bergisch Gladbach, Germany). Isolated CD14<sup>+</sup> cells were transformed into immature monocyte derived DCs by culturing for 2 days at a concentration of  $2 \times 10^6$  cells/ml in Iscove's modified Dulbecco's medium (IMDM; Lonza, Verviers, Belgium) containing 10% heat-inactivated human serum (ABOS) supplemented with 100 ng/ml GM-CSF (Novartis Sandoz Pharmaceuticals, Rotkreutz, Switzerland) and 500 IU/ml IL-4 (Schering-Plough, Innishammon, Cork, Ireland). To generate mature DCs, immature DCs were transformed by culturing for an additional 2-3 days in 10% ABOS IMDM supplemented with 100 ng/ml GM-CSF, 10 ng/ml TNF $\alpha$  (Cellgenix, Freiburg, Germany), 10 ng/ml IL-1 $\beta$  (Sclavo, Siena, Italy), 10 ng/ml IL-6 (Novartis Sandoz Pharmaceuticals), 1  $\mu$ g/ml PGE-2 (Sigma Aldrich/Merck, Darmstadt, Germany), and IFN $\gamma$  (500IU/ml, Boehringer Ingelheim, Rijnland-Palts, Germany).

##### ***Generation and culturing of stimulator cells for functional analyses***

The different stimulator cells used in the functional analyses can be distinguished by the number between brackets, which indicates the individual of which the cells are derived (overview is given in Online Supplementary Table S1). The isolation of CD14<sup>+</sup> cells and the

generation of CD14<sup>+</sup>-derived DCs are described in the section 'Cell collection and preparation'. EBV-transformed lymphoblastoid cell lines (EBV-LCL) were generated using standard procedures and cultured in 10% heat-inactivated FCS supplemented IMDM.<sup>1</sup> PHA (phytohemagglutinin)-blasts were generated by incubating PB-MNC in IMDM supplemented with 10% heat-inactivated ABOS, 100 IU/ml IL-2 and 800 ng/ml PHA-HA16 for seven days after which the PHA-blasts were used in assays. Additionally, third party primary leukemic cell samples (AML, B-ALL, and CLL) expressing the mismatched HLA-DP molecules were selected from the Leiden University Medical Center Biobank for Hematological diseases.

Skin derived human fibroblasts<sup>2</sup> were cultured up to 90% confluency in DMEM (Lonza) supplemented with 10% heat-inactivated FCS and were pre-treated for 4 days with 200 IU/ml IFN $\gamma$  to upregulate HLA-class II expression. K562 (chronic myelogenous leukemia, cultured in 10% FCS IMDM), HeLa (cervical cancer, cultured in 10% FCS IMDM), WiDR (colon adenocarcinoma, cultured in 10% FCS IMDM), EGI-1 (bile duct carcinoma, cultured in 10% FCS MEM (Lonza) supplemented with 1mM Sodium Pyruvate, 2x MEM Amino Acids and 2x MEM non-essential Amino Acids (Thermo Fisher Scientific, Waltham, MA, USA)) cell lines were retrovirally transduced to induce expression of specific HLA-DP molecules. Different HLA-DP alleles were cloned into a pLZRS retroviral vector (an empty pLZRS retroviral vector was used as a mock vector for our control cell lines) and the constructs were verified by sequencing. To retrovirally transduce the different cell lines, Retronectin (recombinant human fibronectin, r-fibronectin, Takara Bio USA, Mountain View, CA, USA) was used.<sup>3</sup>

### ***Recognition assay***

The clonality of expanded T cell clones was confirmed by TCR V $\beta$  repertoire-analysis using the IOTest<sup>®</sup> Beta Mark kit (Beckman Coulter Life Sciences, Indianapolis, Indiana, USA). To investigate the recognition profile of the expanded T cell clones, 2,000 T cells were exposed in a 384-well culture plate to different autologous and allogeneic HLA-DP expressing hematopoietic cells (DCs, EBV-LCL, CD14<sup>+</sup> monocytes, PHA-blasts, K562 transduced with HLA-DP alleles, AML, B-ALL or CLL) in a 1:5 responder to stimulator ratio, and to autologous and allogeneic HLA-DP expressing third party fibroblasts and tissue cell lines transduced with HLA-DP alleles (HeLa's, WiDR, and EGI-1) in a 1:3 responder to stimulator ratio. The supernatants were harvested after overnight incubation of the cells in 10% ABOS IMDM supplemented with 25 IU/ml IL-2, and the amount of IFN $\gamma$  in the supernatants was

quantified using standard enzyme-linked immunosorbent assay (ELISA) according to the manufacturer's instructions (Sanquin Reagents, Amsterdam, The Netherlands). The cytotoxic capacity of a proportion of reactive allo-HLA-DP restricted CD4 T cell clones was confirmed using quantitative FACS analysis of cytotoxicity<sup>2</sup> or by using <sup>51</sup>Cr-release assay<sup>4</sup>.

### ***Flow cytometric analyses***

At the initiation and restimulation of the allo-HLA-DP specific immune responses, the percentages of CD3<sup>+</sup>TCRαβ<sup>+</sup> T cells were measured in the responder population to determine the correct ratio of stimulation. Flow cytometry was performed using counterstaining with fluorescein isothiocyanate (FITC)-labeled TCRαβ (BD Biosciences), phycoerythrin (PE)-labeled CD4 (BD Pharmingen), peridinin chlorophyll protein (PerCP)-labeled CD3 (BD Biosciences), and APC-labeled CD8 (BD Pharmingen) monoclonal antibodies. The expression of HLA-DP was measured on the stimulator cells using PE-labeled HLA-DP monoclonal antibody (Bioconnect, Huissen, Netherlands). Fluorescent events were analyzed using FACSCalibur (BD Biosciences), Cellquest software (BD Biosciences), and FlowJo (FlowJo LLC, Ashland, Oregon USA).

For the enumeration and isolation of CD137<sup>+</sup> CD4 T cells from the *in vitro* HLA-DP immune responses, cells were stained with the monoclonal antibodies PE-labeled CD4 (BD Pharmingen) and APC-labeled CD137 (BD Pharmingen). Alexa Fluor 700 (AF700-) labeled CD8 (Life technologies, Thermo Fisher), FITC-labeled CD14 (BD Pharmingen), CD16 (BD, San Jose, CA, USA), CD19 (BD Pharmingen), and TCRγδ (BD) antibodies were used to set up the dump channel for exclusion. Fluorescent events were analyzed and collected using a FACS Aria (BD Biosciences), FACSDiva software (BD Biosciences), and FlowJo (FlowJo LLC, Ashland, Oregon USA).

| No. | HLA-DP typing                 | Material                                     |
|-----|-------------------------------|----------------------------------------------|
| 1   | DPB1*04:01:01                 | DCs, EBV-LCL                                 |
| 2   | DPB1*03:01:01 & DPB1*04:01:01 | DCs, CD14 <sup>+</sup> , EBV-LCL             |
| 3   | DPB1*03:01 & DPB1*09:01       | DCs, PHA-blasts, EBV-LCL                     |
| 4   | DPB1*03:01 & DPB1*04:02       | DCs, CD14 <sup>+</sup> , PHA-blasts, EBV-LCL |
| 5   | DPB1*02:01:02 & DPB1*04:02:01 | DCs, CD14 <sup>+</sup> , PHA-blasts, EBV-LCL |
| 6   | DPB1*04:02 & DPB1*05:01       | DCs, CD14 <sup>+</sup> , PHA-blasts, EBV-LCL |
| 7   | DPB1*02:01:02 & DPB1*03:01:01 | DCs, CD14 <sup>+</sup>                       |
| 8   | DPB1*01:01 & DPB1*02:01:02    | DCs                                          |
| 9   | DPB1*03:01 & DPB1*04:01       | DCs, CD14 <sup>+</sup> , EBV-LCL             |
| 10  | DPB1*03:01 & DPB1*04:01       | DCs, CD14 <sup>+</sup> , PHA-blasts, EBV-LCL |
| 11  | DPB1*04:01 & DPB1*04:02       | DCs, CD14 <sup>+</sup> , EBV-LCL             |
| 12  | DPB1*02:01:02 & DPB1*04:01:01 | CD14 <sup>+</sup>                            |
| 13  | DPB1*02:01:02 & DPB1*04:01    | EBV-LCL                                      |
| 14  | DPB1*02:01:02 & DPB1*04:01    | EBV-LCL                                      |
| 15  | DPB1*03:01 & DPB1*04:01       | EBV-LCL, Fibro                               |
| 16  | DPB1*02:01 & DPB1*04:02       | EBV-LCL                                      |
| 17  | DPB1*03:01 & DPB1*04:01       | EBV-LCL                                      |
| 18  | DPB1*02:01:02                 | EBV-LCL, Fibro                               |
| 19  | DPB1*02:01:02 & DPB1*04:02    | EBV-LCL, Fibro                               |
| 20  | DPB1*02:01 & DPB1*04:01:01    | EBV-LCL, Fibro                               |
| 21  | DPB1*02:01:02 & DPB1*04:02    | EBV-LCL                                      |
| 22  | DPB1*03:01 & DPB1*04:02       | EBV-LCL, Fibro                               |
| 23  | DPB1*02:01 & DPB1*04:02       | EBV-LCL                                      |
| 24  | DPB1*03:01 & DPB1*04:02       | EBV-LCL                                      |
| 25  | DPB1*02:01:02 & DPB1*04:01:01 | EBV-LCL                                      |
| 26  | DPB1*03:01 & DPB1*04:02       | EBV-LCL, Fibro                               |
| 27  | DPB1*03:01 & DPB1*04:01       | EBV-LCL, Fibro                               |
| 28  | DPB1*02:01 & DPB1*03:01       | AML                                          |
| 29  | DPB1*02:01:02 & DPB1*04:01    | AML                                          |
| 30  | DPB1*02:01:02 & DPB1*03:01    | AML                                          |
| 31  | DPB1*02:01 & DPB1*04:01:01    | AML                                          |
| 32  | DPB1*02:01 & DPB1*03:01       | AML                                          |
| 33  | DPB1*03:01 & DPB1*04:01:01    | AML                                          |
| 34  | DPB1*03:01 & DPB1*04:02       | AML                                          |
| 35  | DPB1*03:01 & DPB1*04:02       | AML                                          |
| 36  | DPB1*04:01:01                 | AML                                          |
| 37  | DPB1*04:01                    | AML                                          |
| 38  | DPB1*04:01 & DPB1*04:02       | AML                                          |
| 39  | DPB1*04:02 & DPB1*09:01       | AML                                          |
| 40  | DPB1*04:02:01 & DPB1*11:01:01 | AML                                          |
| 41  | DPB1*02:01 & DPB1*04:02       | B-ALL                                        |
| 42  | DPB1*02:01:02 & DPB1*04:01    | B-ALL                                        |
| 43  | DPB1*02:01 & DPB1*03:01       | B-ALL                                        |
| 44  | DPB1*03:01 & DPB1*04:02       | B-ALL                                        |
| 45  | DPB1*03:01 & DPB1*11:01:01    | B-ALL                                        |
| 46  | DPB1*03:01:01 & DPB1*11:01:01 | B-ALL, Fibro                                 |
| 47  | DPB1*04:01 & DPB1*04:02       | B-ALL                                        |
| 48  | DPB1*04:01:01 & DPB1*04:02    | B-ALL                                        |
| 49  | DPB1*03:01 & DPB1*04:01:01    | B-ALL                                        |
| 50  | DPB1*02:01 & DPB1*03:01       | CLL                                          |
| 52  | DPB1*02:01:02 & DPB1*04:01    | CLL                                          |
| 53  | DPB1*04:01 & DPB1*04:02       | CLL                                          |
| 54  | DPB1*04:02 & DPB1*15:01       | CLL                                          |
| 56  | DPB1*04:01 & DPB1*04:02       | CLL                                          |
| 57  | DPB1*04:01                    | DCs, EBV-LCL                                 |

**Supplementary Table S1. Overview cell materials.** No. = number indicates individual of which the cells are derived, DCs = CD14-derived dendritic cells, EBV-LCL = EBV-transformed lymphoblastoid cell lines, CD14<sup>+</sup> = monocytes, PHA-blasts = lympho-blasts by phytohemagglutinin treatment, Fibro = skin derived human fibroblasts, AML/B-ALL/CLL = primary malignant cell samples.

**Results**

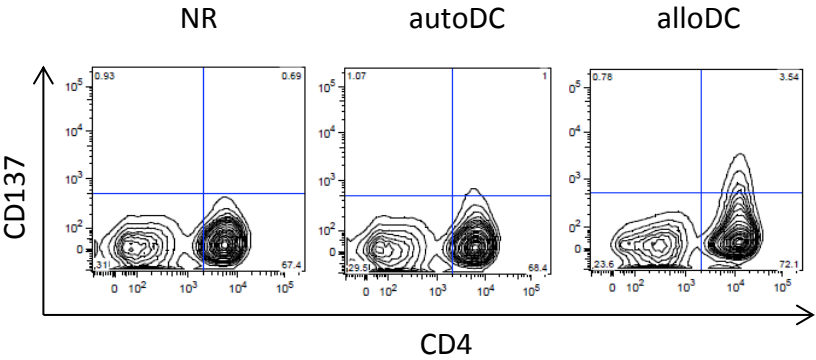

**Supplementary Figure S1. Enrichment of allo-reactive T cells.** Density plots of CD137 expression on the not restimulated (NR), autologous dendritic cells (autoDC) stimulated and allogeneic dendritic cells (alloDC) restimulated responder cells (representative example, response 4).

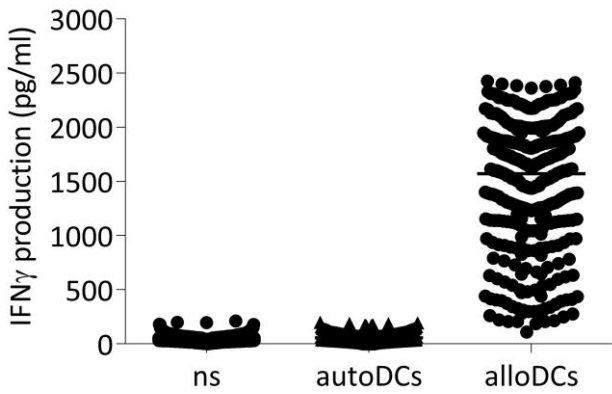

**Supplementary Figure S2. IFN $\gamma$  production by allo-reactive T cells.** IFN $\gamma$  production by allo-reactive T cell clones (response 4 as representative example) after overnight stimulation without stimulator cells (ns = no stimulation), autologous dendritic cells (autoDCs) or allogeneic dendritic cells (alloDCs).

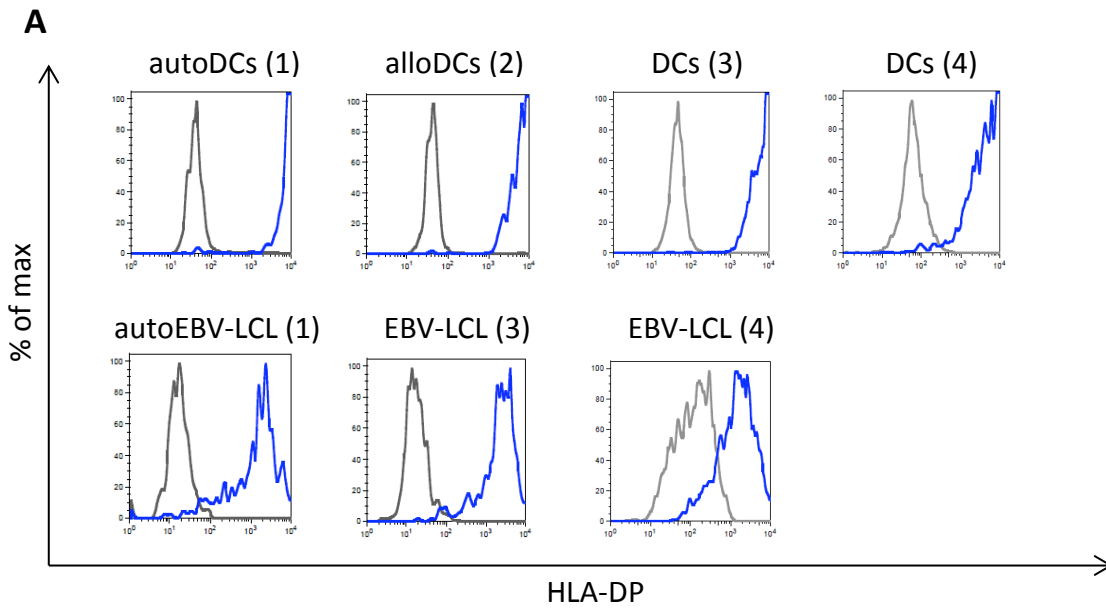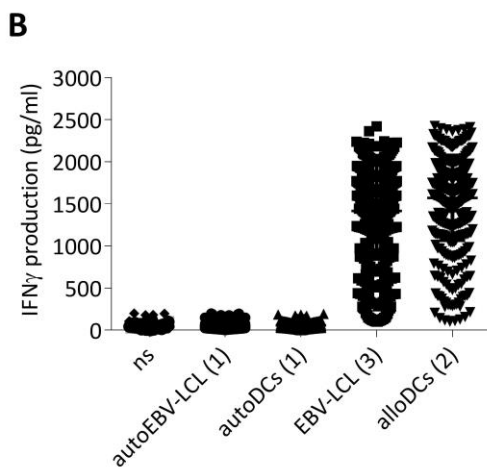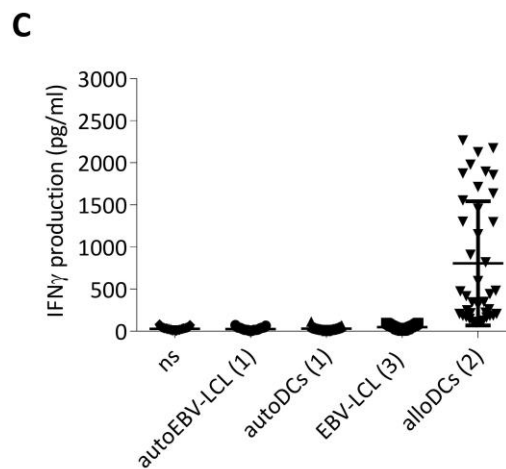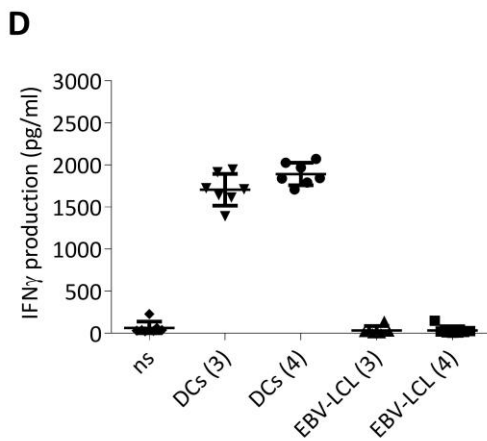

**Supplementary Figure S3. IFN $\gamma$  production by HLA-DP restricted CD4 T cell clones.** **A.** Representative histograms (response 4) show the HLA-DP expression measured by flow cytometry (the blue curves represent stained cells and the grey curves unstained cells) on hematopoietic cells (CD14-derived dendritic cells; DCs, and EBV-transformed lymphoblastoid cell lines; EBV-LCL). **B-D.** IFN $\gamma$  production by HLA-DPB1\*03:01 restricted T cell clones (response 4 as representative example) after overnight incubation with stimulator cells. **B.** Reactivity against allogeneic DCs (alloDCs) and third party EBV-LCL expressing the mismatched HLA-DPB1 allele. **C.** Reactivity against alloDCs, but not against EBV-LCL. **D.** Reactivity by representative alloDC recognizing T cell clones ( $n=7$ ) against third party DCs. The number between brackets in the figure indicates of which individual the stimulator cells are derived.

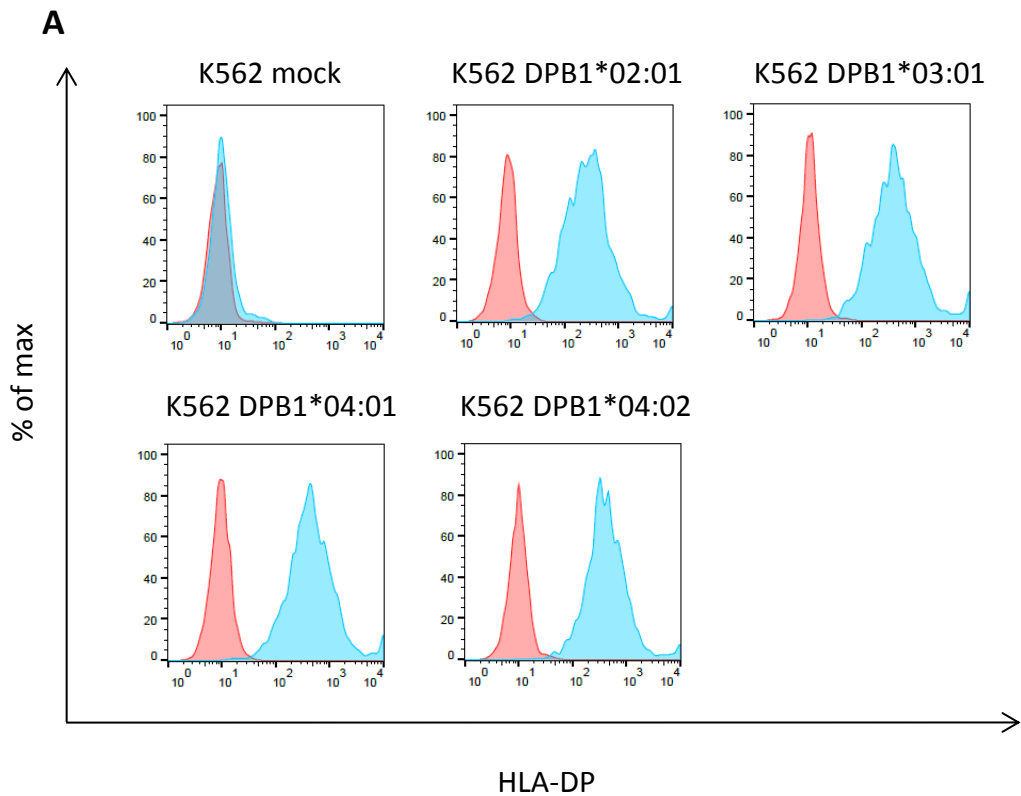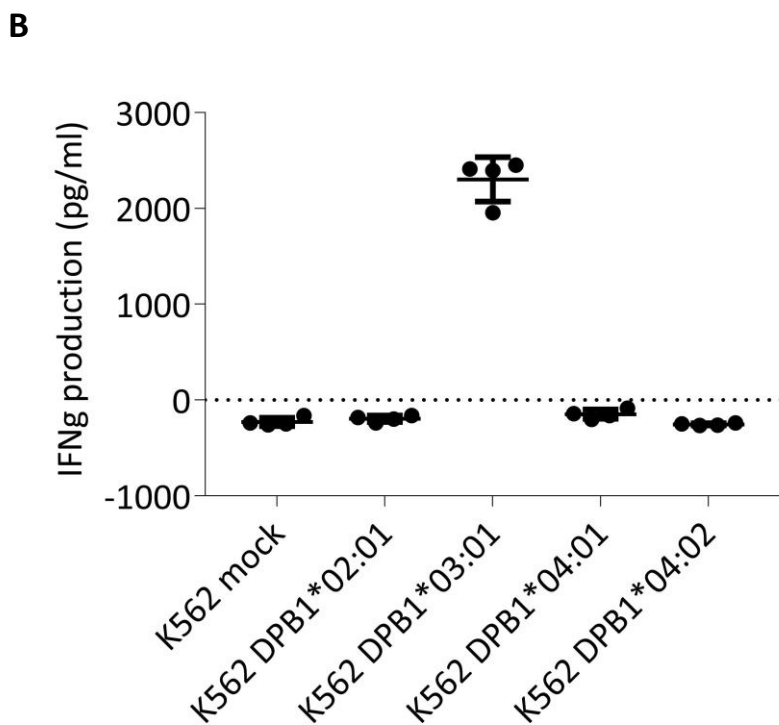

**Supplementary Figure S4. IFN $\gamma$  production by HLA-DPB1 restricted CD4 T cell clones. A.** Histograms show the HLA-DP expression measured by flow cytometry (blue represents stained cells and red unstained cells) on the retrovirally transduced K562 cell lines. **B.** IFN $\gamma$  production of representative HLA-DPB1\*03:01 restricted T cell clones (n=4 of response 4) after overnight incubation with different K562 cell lines.



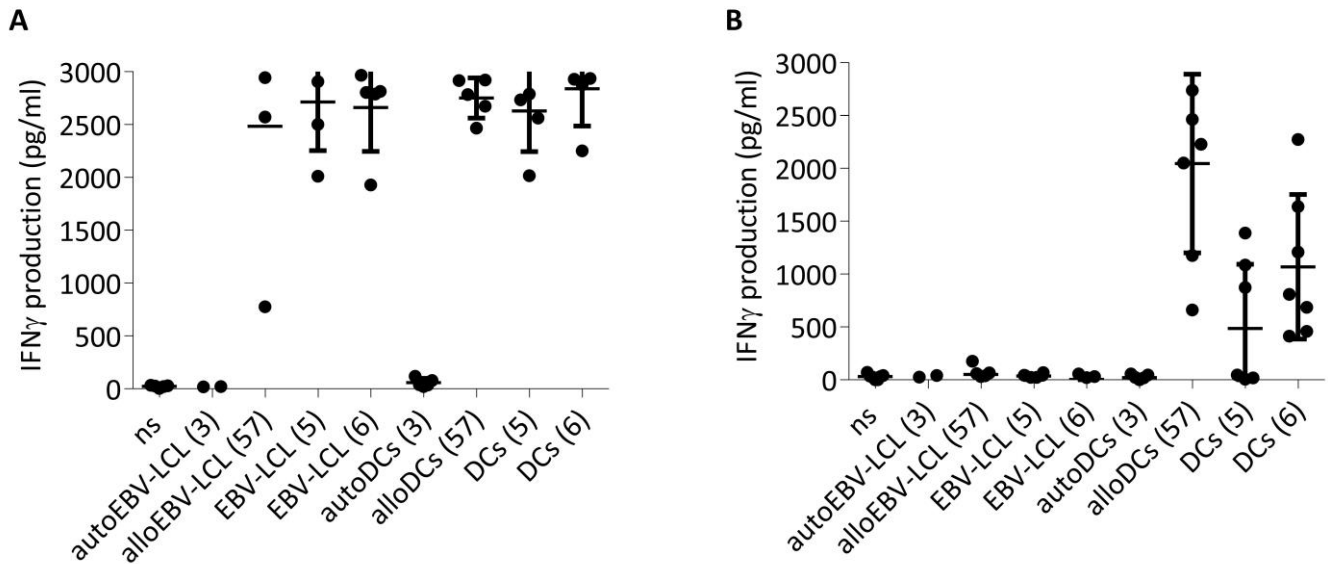

**Supplementary Figure S5. IFN $\gamma$  production by HLA-DQB1 restricted CD4 T cell clones.** IFN $\gamma$  production of representative HLA-DQB1\*06:03 restricted T cell clones (response 5) after overnight incubation with stimulator cells. **A.** Reactivity against allogeneic EBV-transformed lymphoblastoid cell lines (alloEBV-LCL), third party EBV-LCL, allogeneic CD14-derived dendritic cells (alloDCs) and third party DCs expressing the mismatched HLA-DQB1 allele. **B.** Reactivity against alloDCs and third party DCs, but not against EBV-LCL. The number between brackets indicates of which individual the stimulator cells are derived.

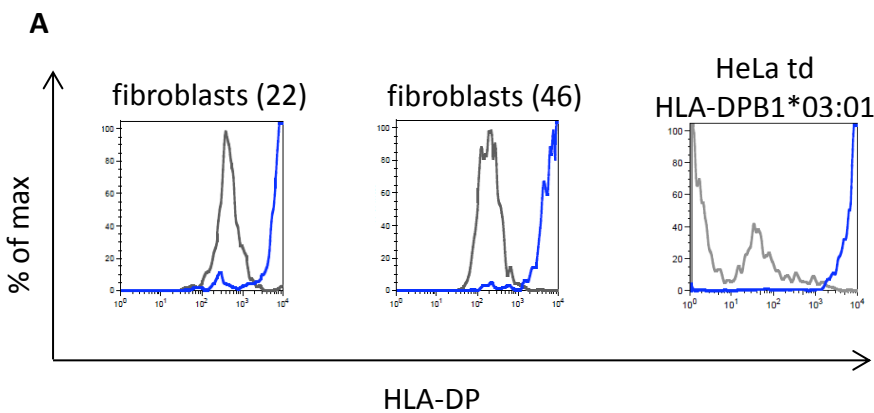

**Supplementary Figure S6. IFN $\gamma$  production by HLA-DP restricted CD4 T cell clones with different recognition patterns (figure is continued on next page).** **A.** Representative histograms (DPB1\*03:01 positive stimulator cells used for analysis of T cell clone reactivity in response 4) show the HLA-DP expression (the blue curves represent stained cells and the grey curves unstained cells) measured by flow cytometry on non-hematopoietic cell lines: third party fibroblasts and HeLa's transduced with the mismatched HLA-DP allele. **B-F.** IFN $\gamma$  production by HLA-DPB1\*03:01 restricted T cell clones (response 4 as representative example) after overnight incubation with stimulator cells. **B.** Reactivity against third party EBV-transformed lymphoblastoid cell lines (EBV-LCL). **C.** Restricted reactivity against only allogeneic CD14-derived dendritic cells (alloDCs). **D.** Reactivity against third party EBV-LCL, third party fibroblasts and HeLa's transduced with the mismatched HLA-DPB1 allele. **E.** Restricted reactivity against third party EBV-LCL and third party fibroblasts. **F.** Restricted reactivity against allogeneic EBV-LCL (alloEBV-LCL) and HeLa's transduced with the mismatched HLA-DPB1 allele. The number between brackets in the figure indicates of which individual the stimulator cells are derived.

**B**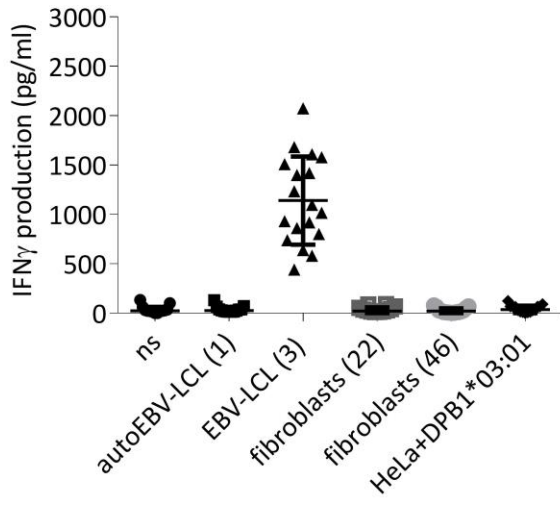**C**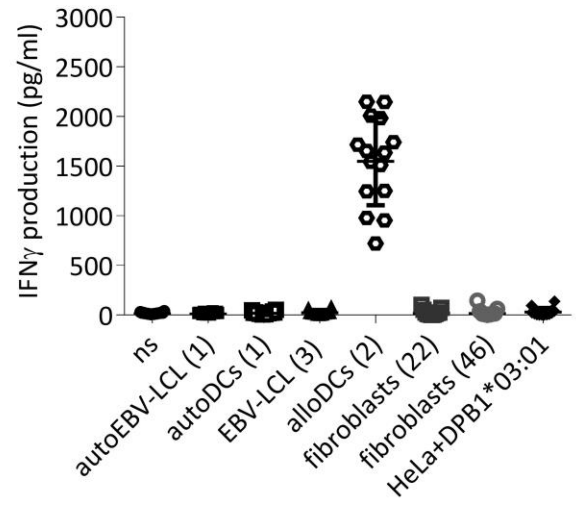**D**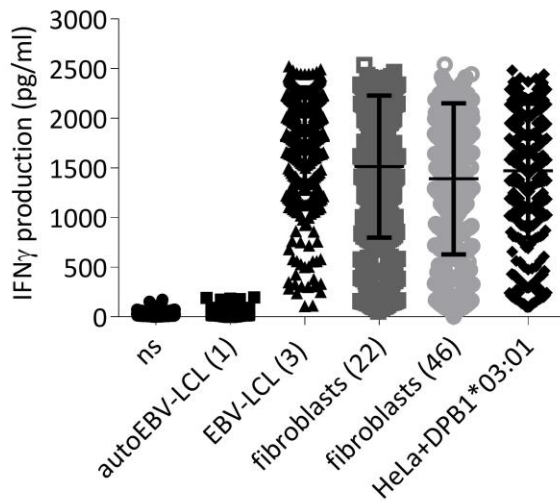**E**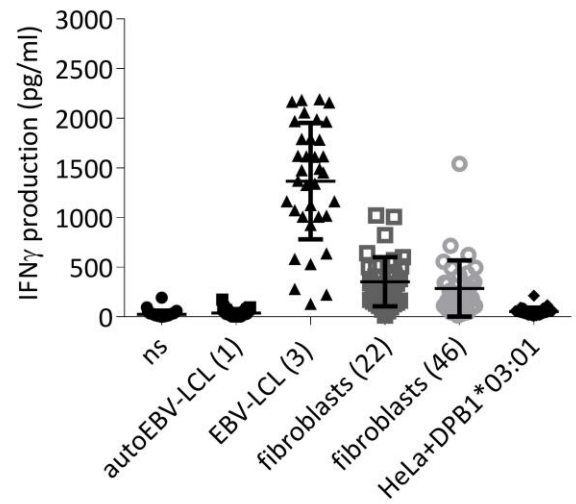**F**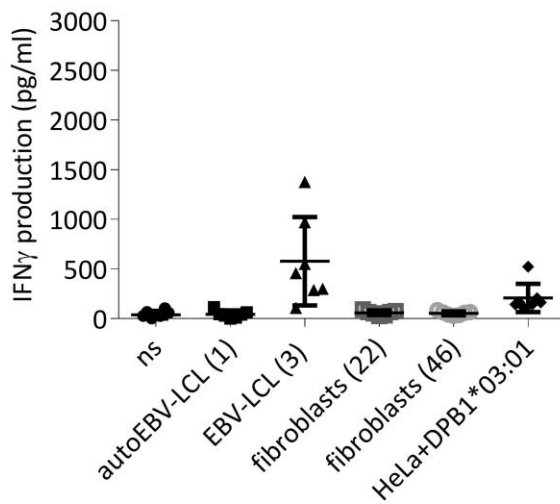

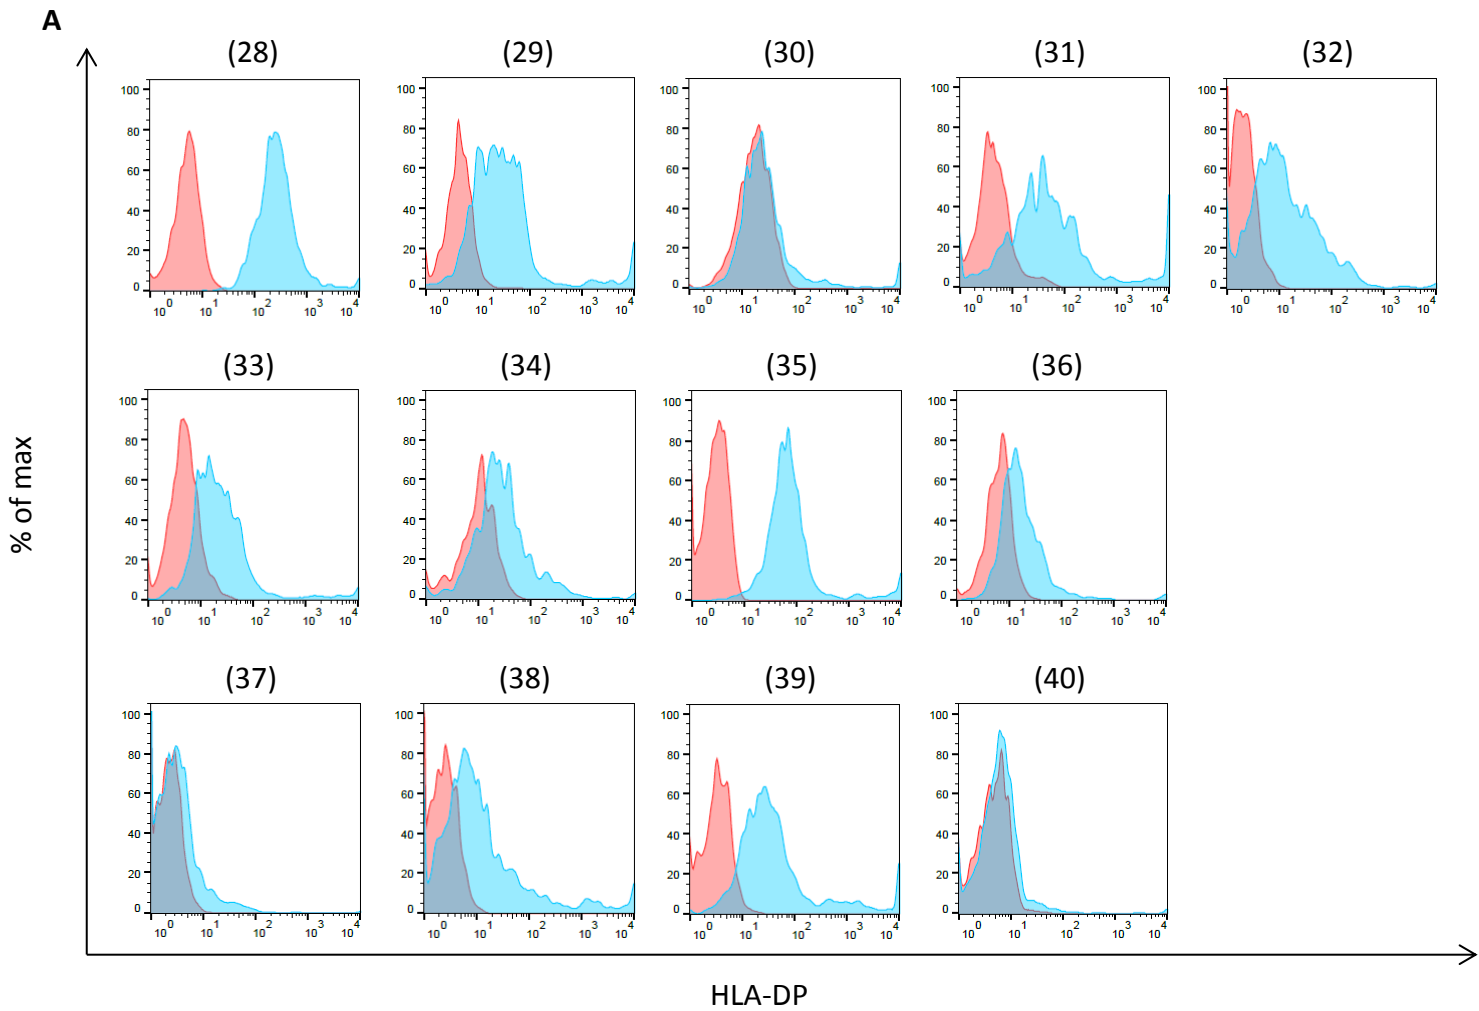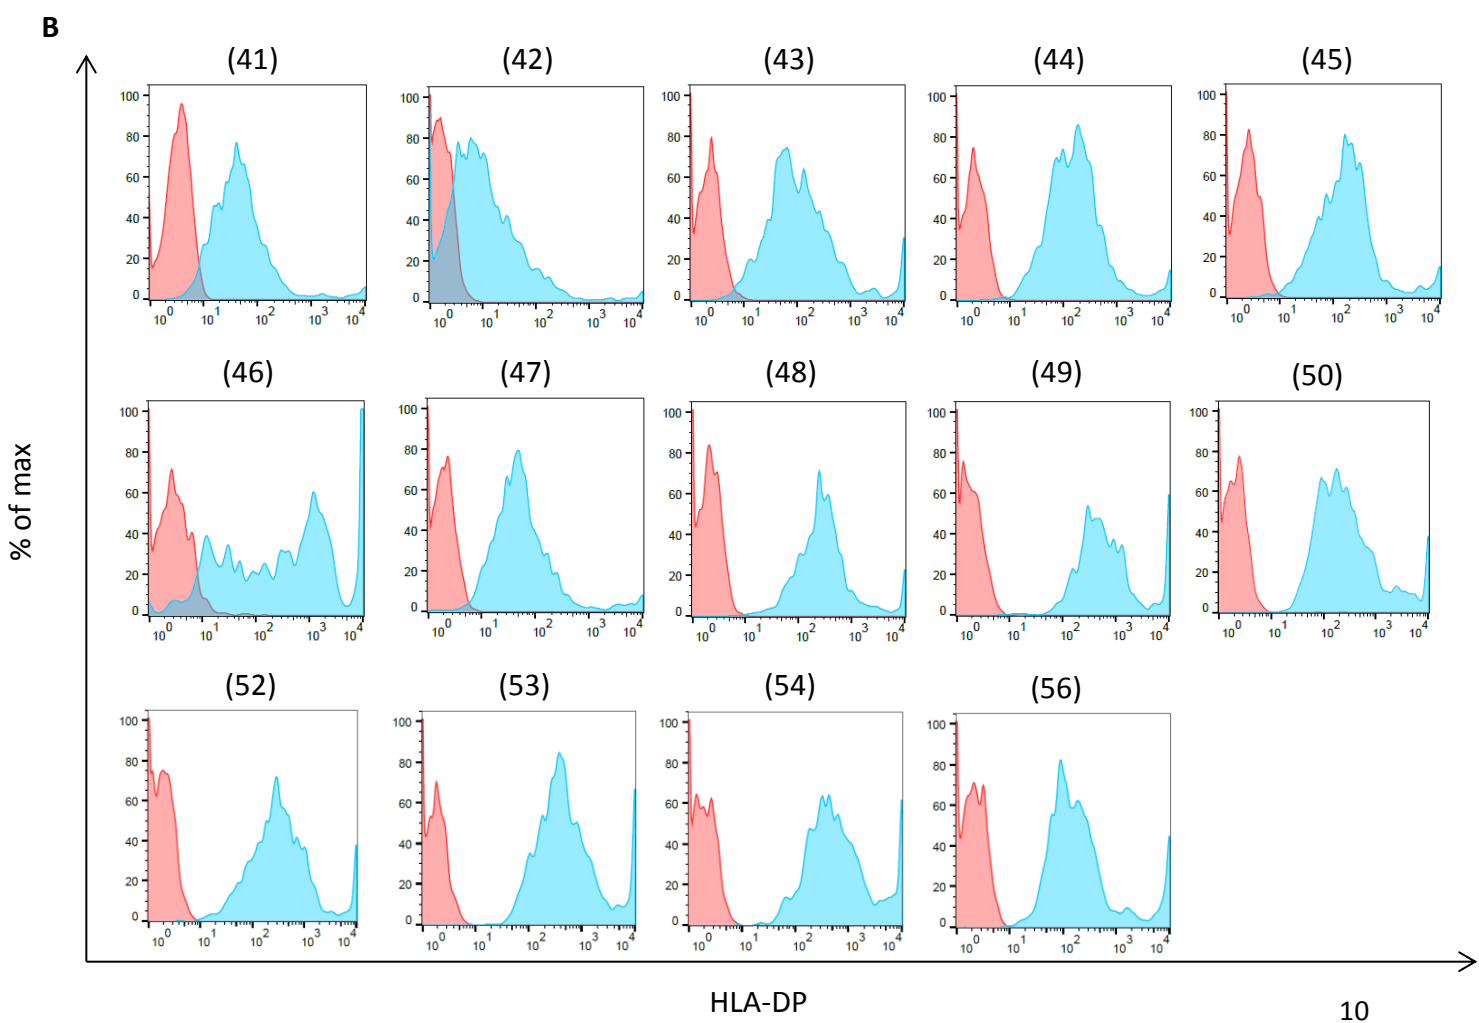

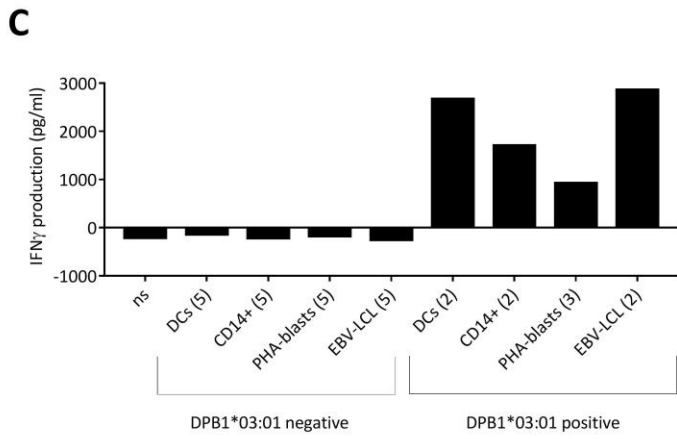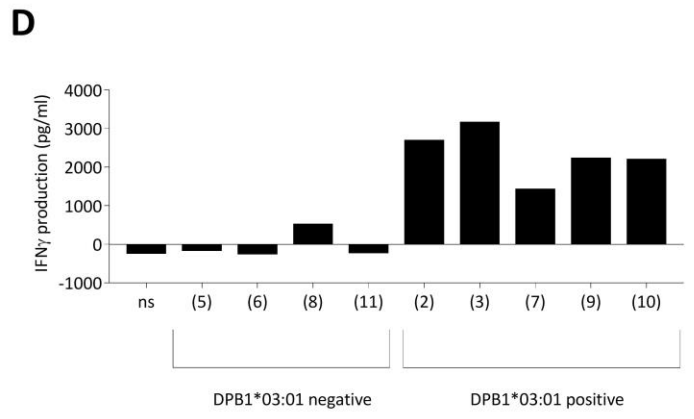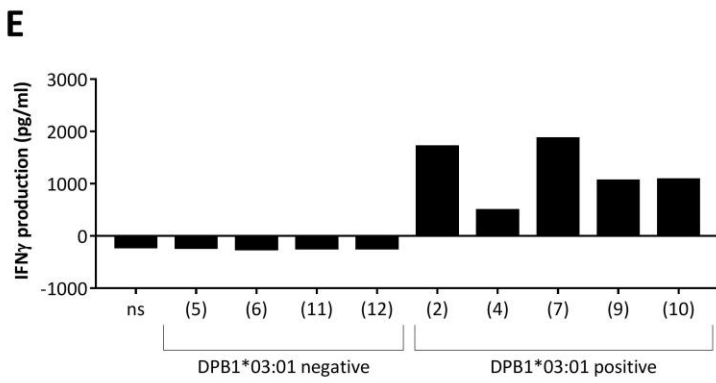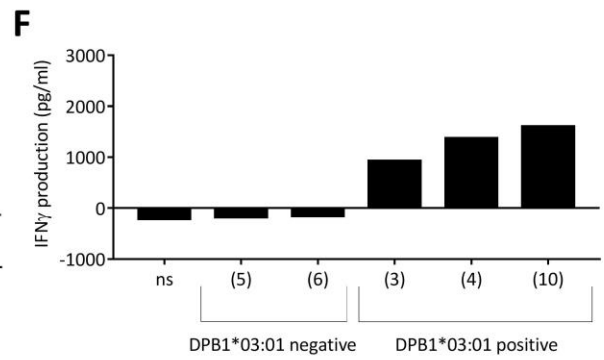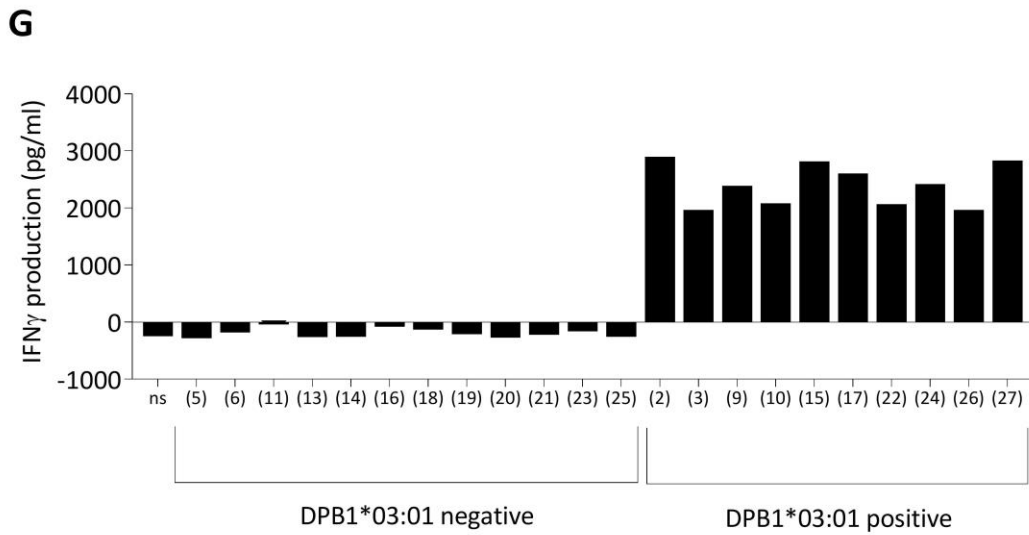

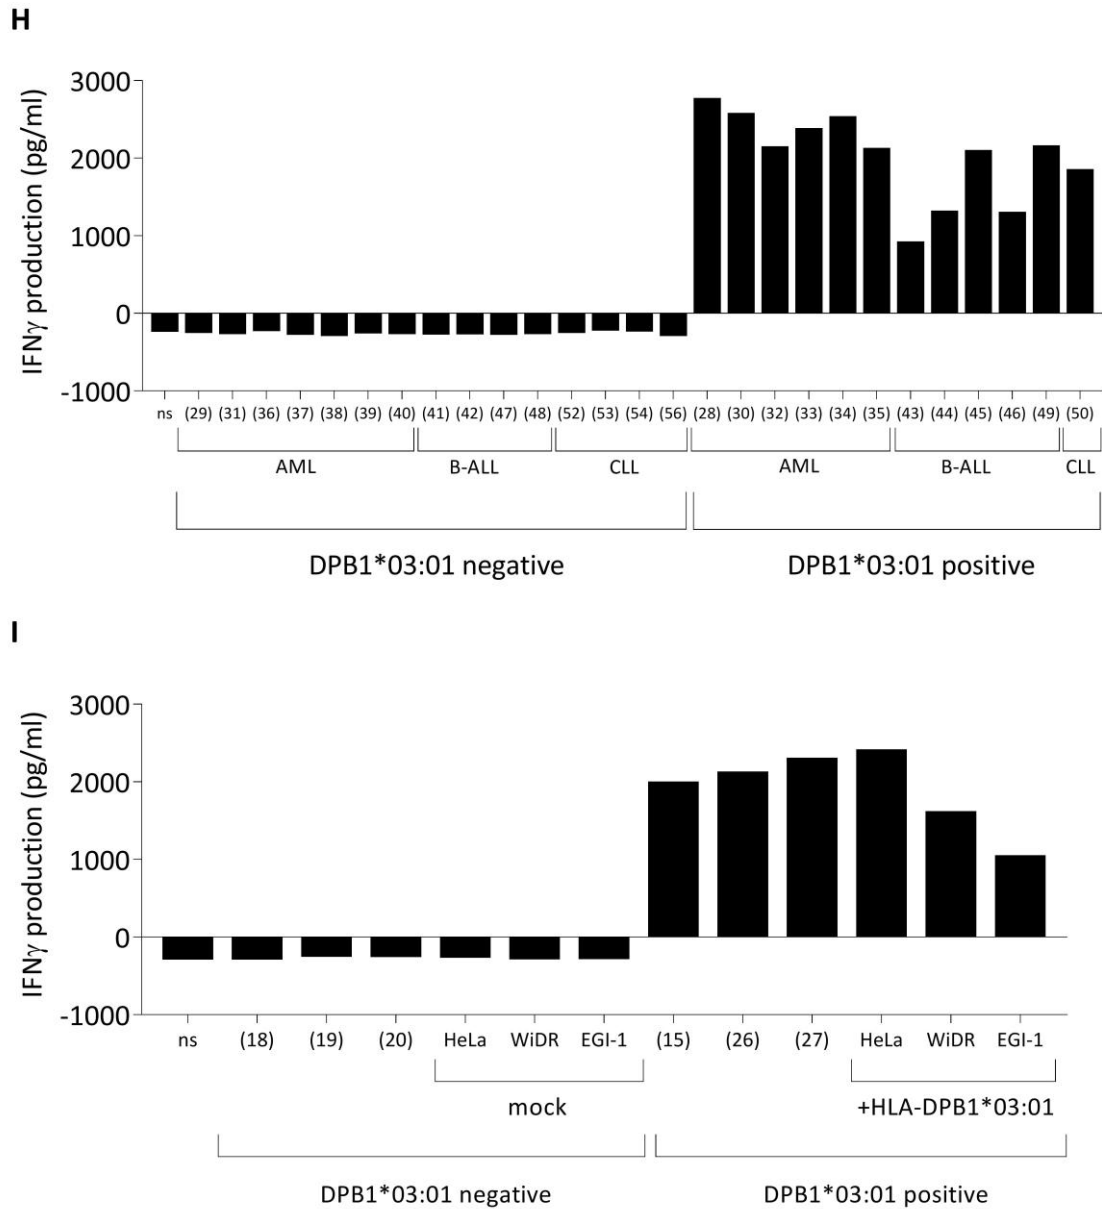

**Supplementary Figure S7. Recognition of primary malignant and non-malignant hematopoietic and non-hematopoietic cells by allo-HLA-DP restricted T cells.** A-B. Histograms show the HLA-DP expression (the blue represents stained cells and the red unstained cells) measured by flow cytometry on leukemia cell samples; **A.** AML samples, **B.** B-ALL (41-49) and CLL (50-56) samples. C-I. Representative HLA-DPB1\*03:01 restricted T cell clone (derived from response 4) with broad tissue recognition, showing reactivity against **C.** hematopoietic cells, **D.** panel of DCs, **E.** monocytes, **F.** PHA-blasts and **G.** EBV-LCL. The T cell clone also shows reactivity against **H.** primary malignant cells and **I.** non-hematopoietic cells expressing the mismatched HLA-DP allele. This recognition pattern was seen for the tested T cell clones of response 2 (n=3), response 3 (n=3), response 4 (n=3) and response 5a (n=3). The number between brackets in the figure indicates of which individual the stimulator cells are derived.

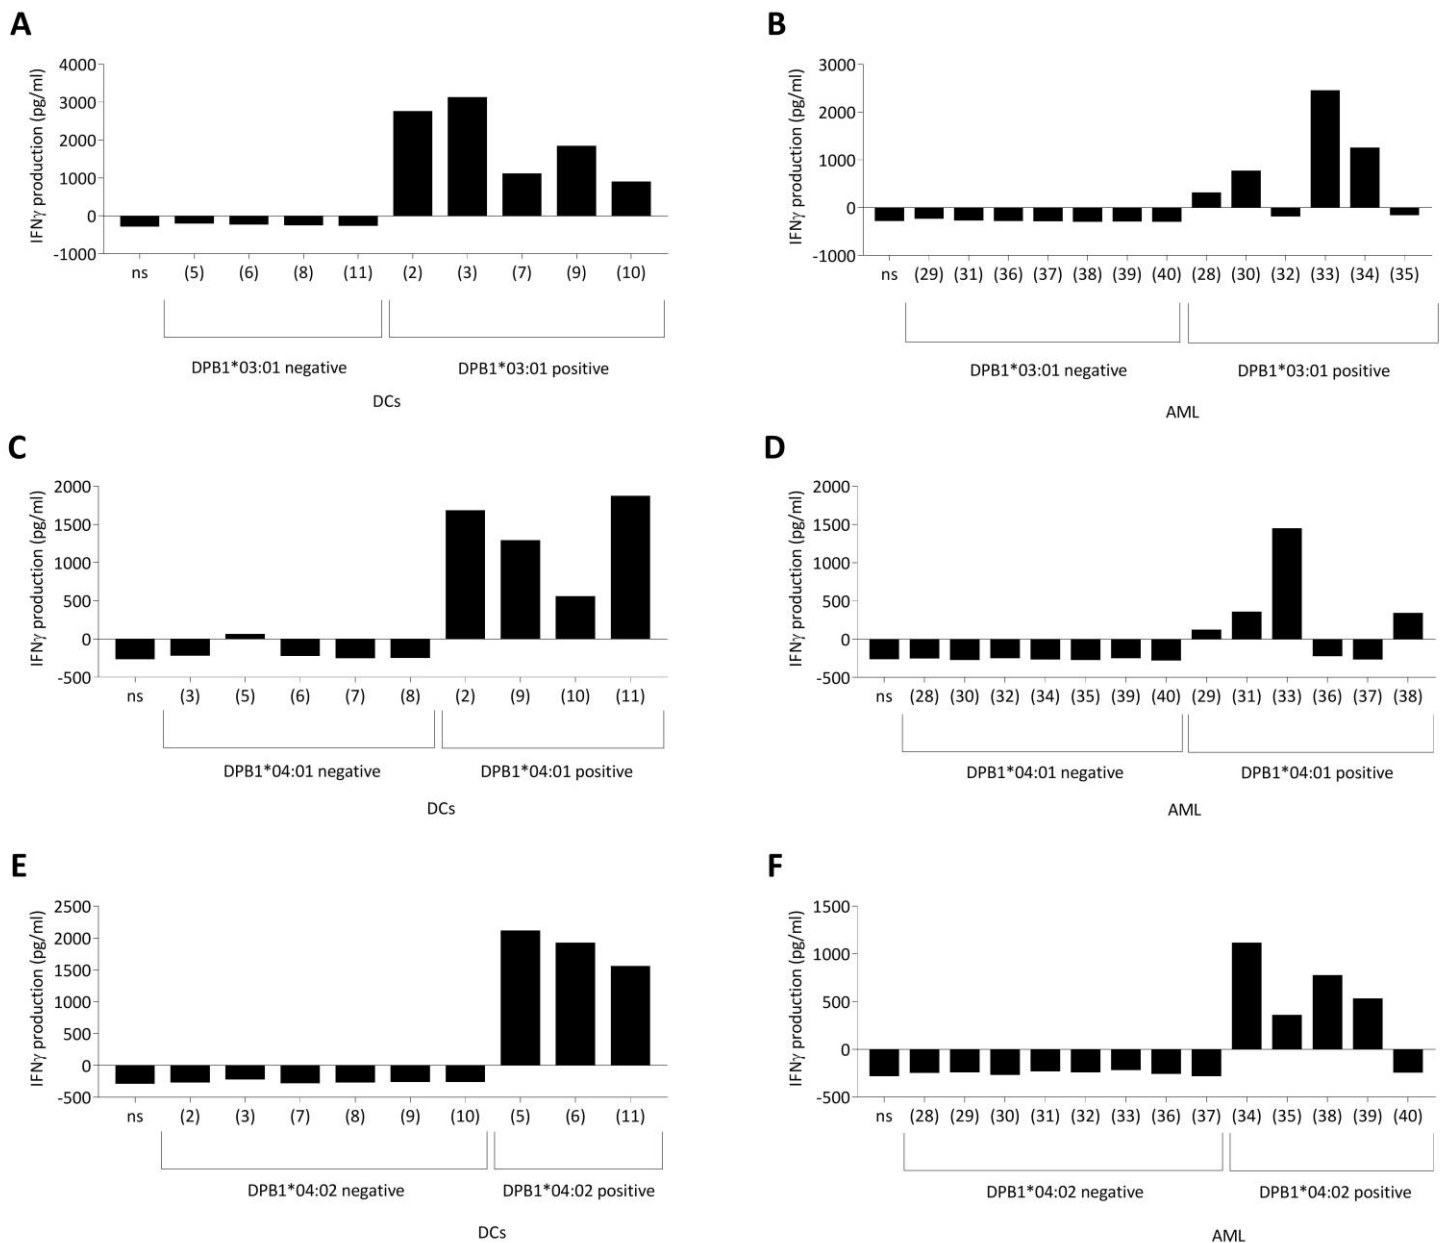

**Supplementary Figure S8. Differential recognition of primary AML blasts.** IFN $\gamma$  production by different representative HLA-DPB1 restricted T cell clones. **A.** Reactivity of a representative HLA-DPB1\*03:01 restricted T cell clone against HLA-DPB1\*03:01 positive CD14-derived dendritic cells (DCs) and **B.** against HLA-DPB1\*03:01 positive primary AML blasts. **C.** Reactivity of a representative HLA-DPB1\*04:01 restricted T cell clone against HLA-DPB1\*04:01 positive DCs and **D.** against HLA-DPB1\*04:01 positive primary AML blasts. **E.** Reactivity of a representative HLA-DPB1\*04:02 restricted T cell clone against HLA-DPB1\*04:02 positive DCs and **F.** against HLA-DPB1\*04:02 positive primary AML blasts. The number between brackets indicates of which individual the stimulator cells are derived.

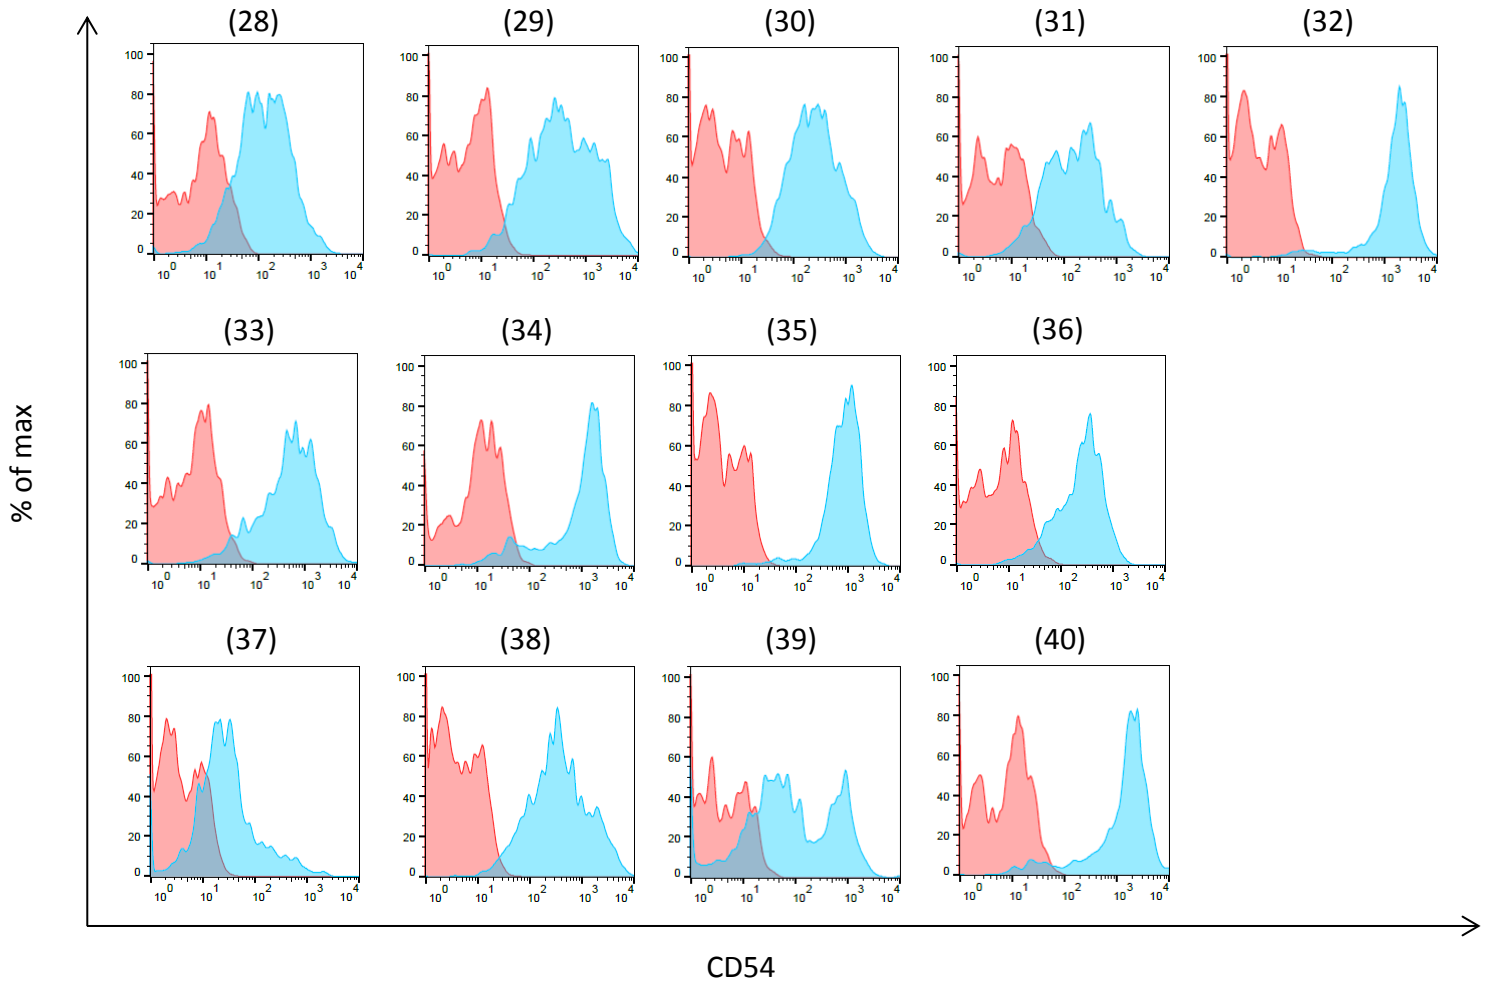

**Supplementary Figure S9. CD54 expression on primary AML blasts.** Histograms show CD54 expression (the blue represents stained cells and the red unstained cells) measured by flow cytometry on primary AML blasts. The number between brackets indicates of which individual the stimulator cells are derived.

## References

1. Van Bergen CA, Rutten CE, Van Der Meijden ED, et al. High-throughput characterization of 10 new minor histocompatibility antigens by whole genome association scanning. *Cancer Res.* 2010;70(22):9073-9083.
2. van der Zouwen B, Kruisselbrink AB, Frederik Falkenburg JH, Jedema I. Collateral damage of nonhematopoietic tissue by hematopoiesis-specific T cells results in graft-versus-host disease during an ongoing profound graft-versus-leukemia reaction. *Biol Blood Marrow Transplant.* 2014;20(6):760-769.
3. Rutten CE, van Luxemburg-Heijs SA, Griffioen M, et al. HLA-DP as specific target for cellular immunotherapy in HLA class II-expressing B-cell leukemia. *Leukemia.* 2008;22(7):1387-1394.
4. van der Zouwen B, Kruisselbrink AB, Jordanova ES, et al. Alloreactive effector T cells require the local formation of a proinflammatory environment to allow crosstalk and high avidity interaction with nonhematopoietic tissues to induce GVHD reactivity. *Biol Blood Marrow Transplant.* 2012;18(9):1353-1367.
