# Supplementary material for: The allogeneic HLA-DP-restricted T-cell repertoire provoked by allogeneic dendritic cells contains T cells that show restricted recognition of hematopoietic cells including primary malignant cells
Source: PubMed Central journal article supplement — Haematologica. 2018 Sep 20;104(1):197–206. doi: 10.3324/haematol.2018.193680 (PMC6312030; doi:10.3324/haematol.2018.193680), 2019-01
Supplement: 2018_193680-Disclosures_and_Contributions.pdf [file 2018_193680-Disclosures_and_Contributions.pdf]

Haematologica  
HAEMATOL/2018/193680  
Version 3

The allo-HLA-DP restricted T cell repertoire provoked by allogeneic dendritic cells contains T cells that show restricted recognition of hematopoietic cells including primary malignant cells

Aicha Laghmouchi, Conny Hoogstraten, Peter Van Balen, J. H. Frederik Falkenburg, and Inge Jedema

Disclosures: none

Contributions: AL, CH, JF and IJ designed and analyzed the experiments. AL, CH performed the experiments. AL, CH, PB, JF and IJ evaluated and discussed data. AL, JF and IJ wrote the manuscript.
